# Supplementary material
Source: Springer Nature journal article supplement (https://www.springermedizin.de/resource/supplementary/12879_2011_1616_MOESM5_ESM.pdf/9442942)
Supplement: MOESM5 [file 9442942]

Pre-test Probability (%)

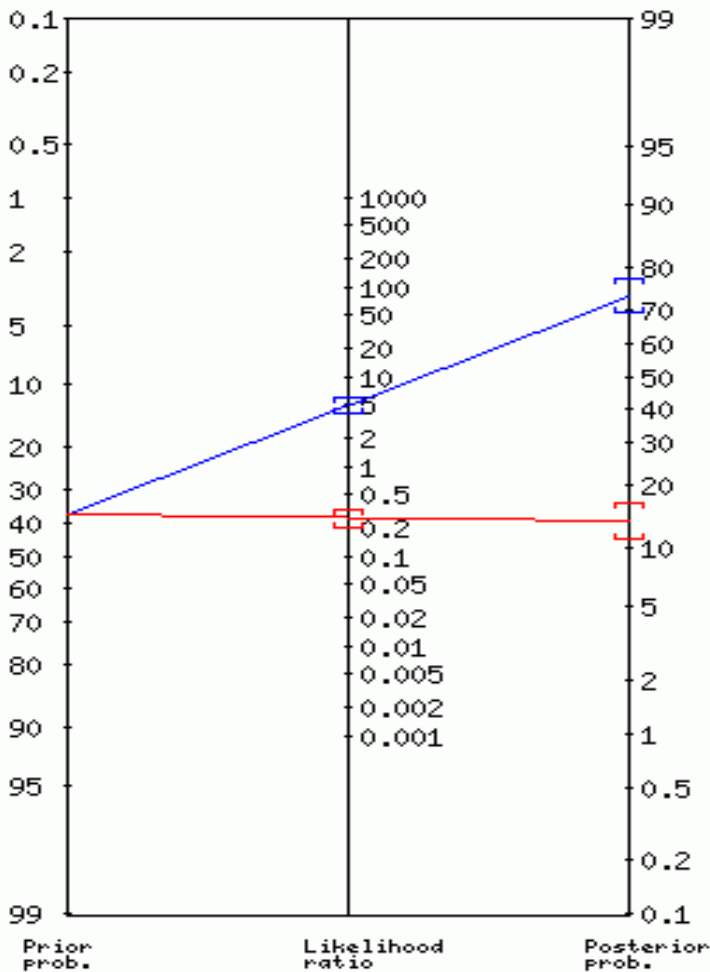

Post-test Probability (%)

Prior Probability = 37%

— Positive LR = 6.0

Post-test Probability = 74%

— Negative LR = 0.2

Post-test Probability = 13%
